# Supplementary material for: Electrocatalytic redox behavior of graphene films towards acebutolol hydrochloride determination in real samples
Source: Royal Society of Chemistry journal article supplement (doi:10.1039/c5nj03655k), 2016-01-01
Supplement: c5nj03655k1.pdf [file c5nj03655k1.pdf]

New Journal of Chemistry

Electronic Supplementary Information

Electrocatalytic redox behavior of graphene film towards acebutolol hydrochloride  
determination in real samples

Atmanand M. Bagoji and Sharanappa T. Nandibewoor\*

P. G. Department of studies in chemistry, Karnatak University, Dharwad-580003, India

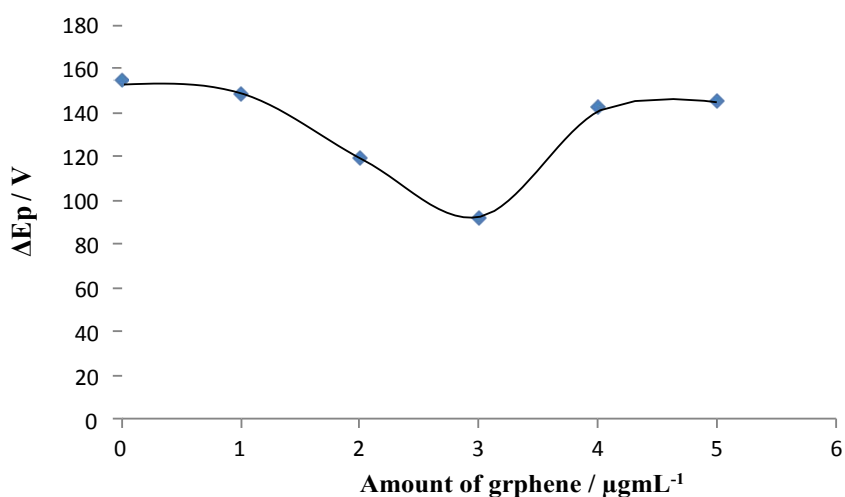

ESI Fig. 1 Variation of  $\Delta E_p$  with the amount of graphene deposited onto the surface of GCE

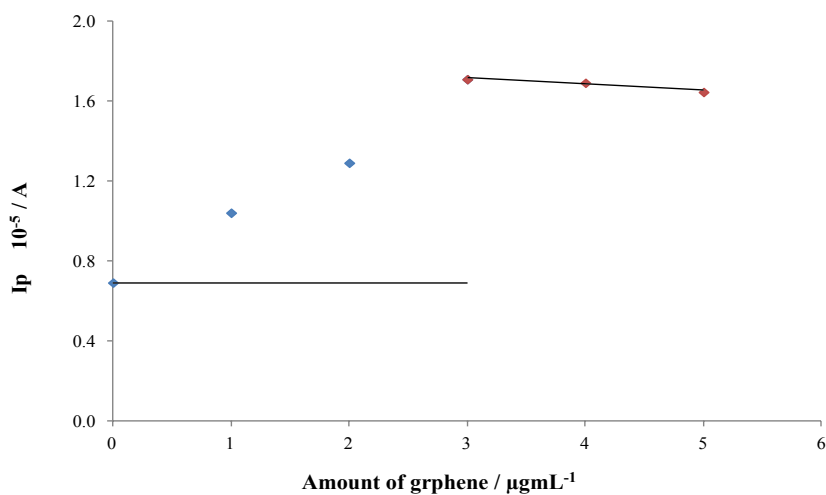

ESI Fig. 2 Variation of peak current with the amount of graphene deposited onto the surface of GCE

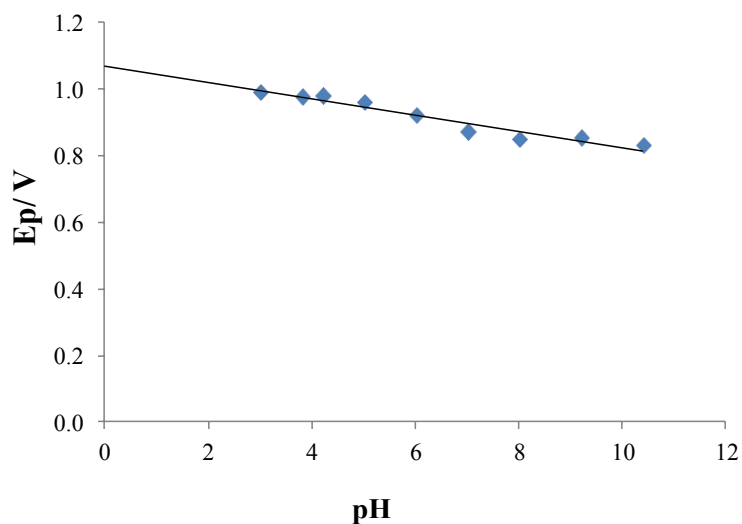

ESI Fig. 3 The plot of variation of peak (peak B) potential  $E_p$  (V) with pH for 1.0mM ACBT at GF-GCE

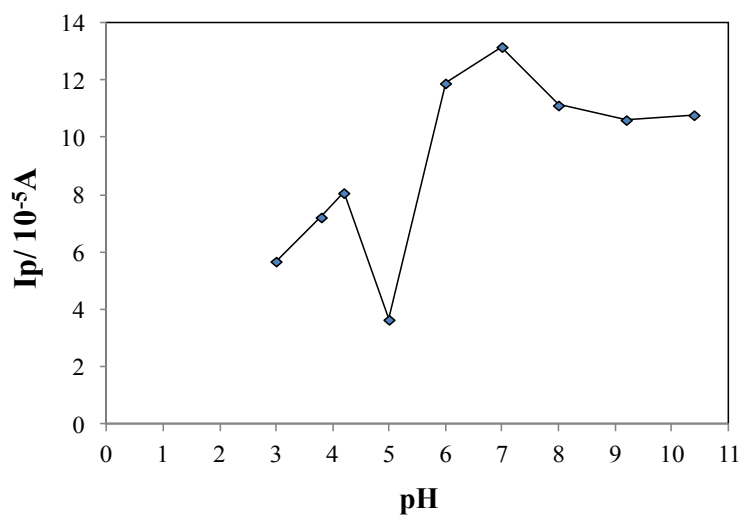

ESI Fig. 4 The plot of variation of peak current (peak B) of 1.0 mM ACBT at GF-GCE with pH.

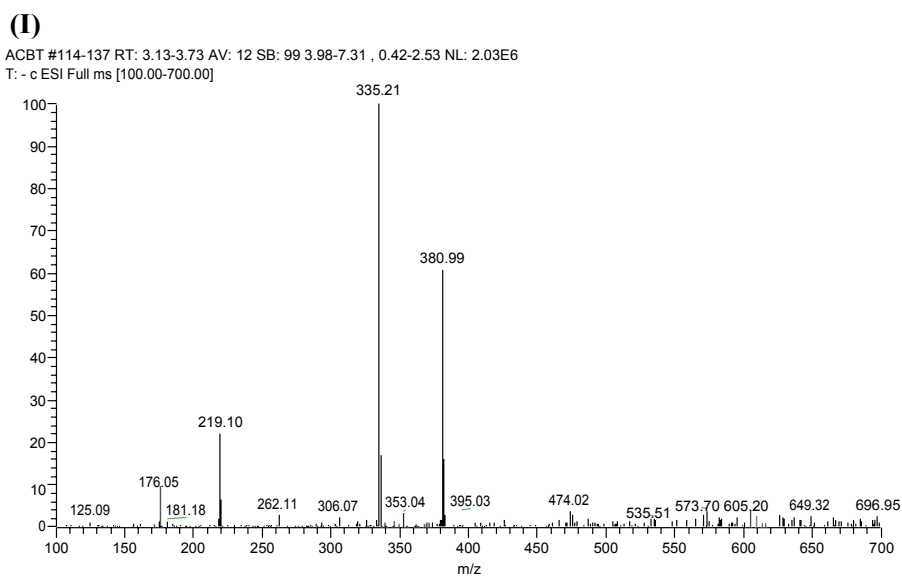

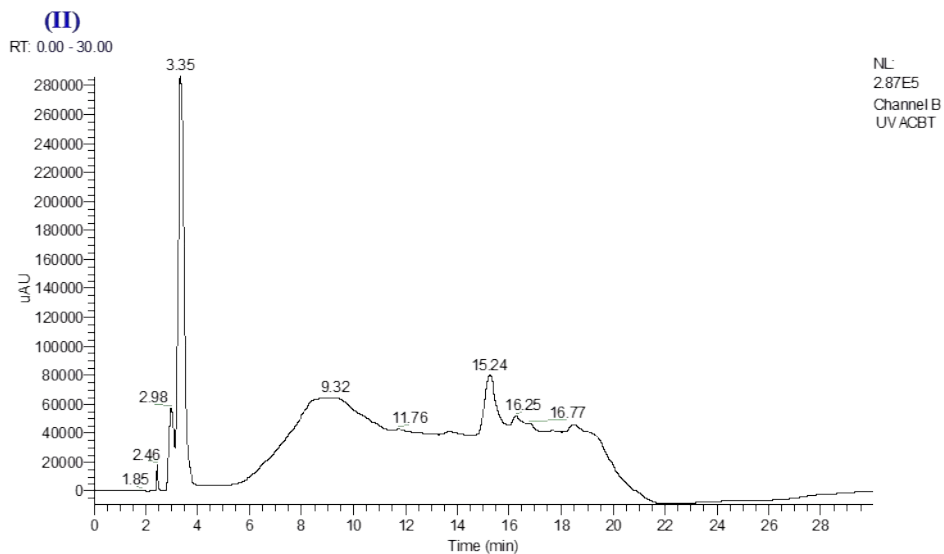

ESI Fig. 5(I) ESI-mass spectrum of electrolysed product and (II) Chromatogram of the electrolysed product of ACBT.

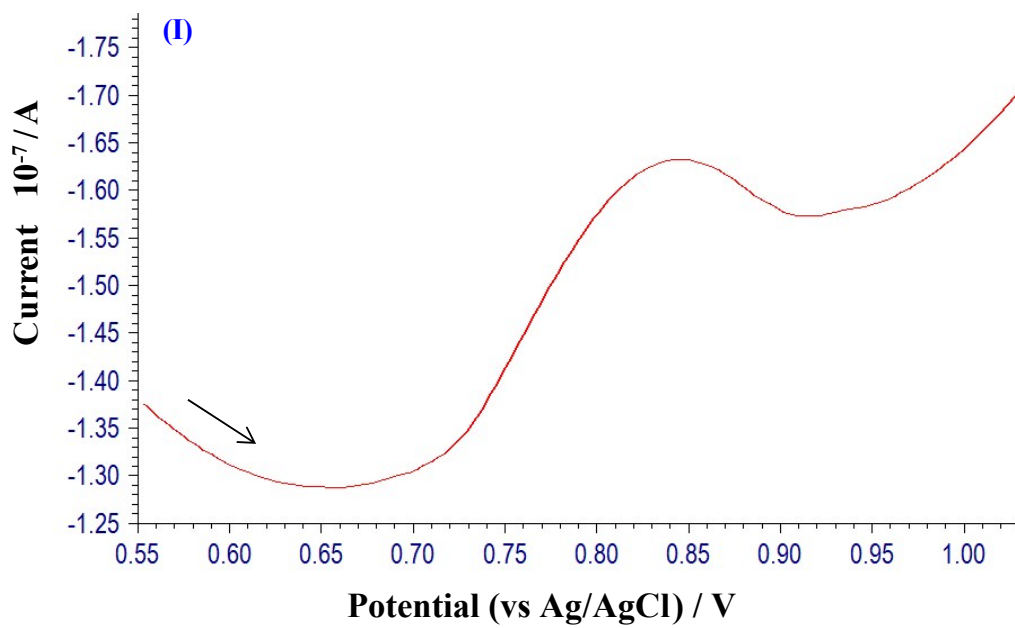

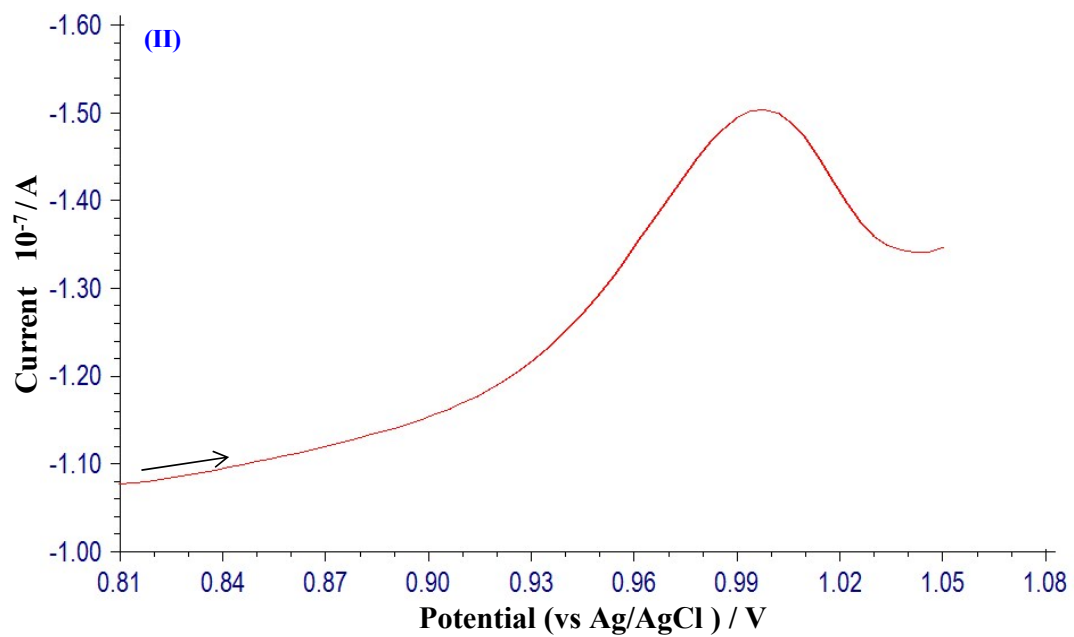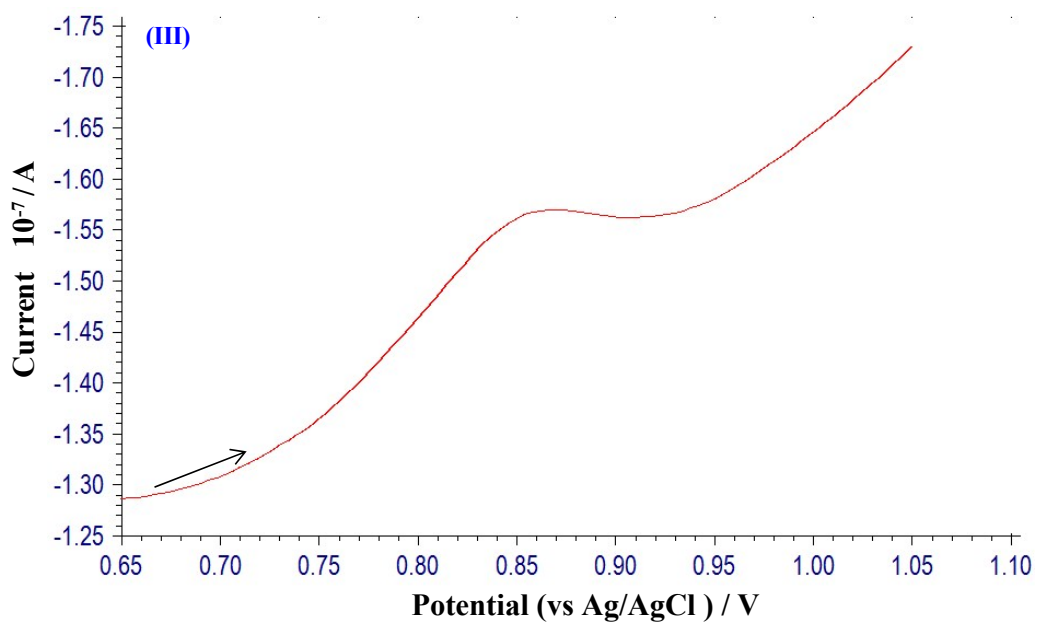

ESI Fig. 6 The effect of excipients (I) uric acid, (II) ascorbic acid and (III) dopamine on the voltammogram of ACBT
